# Supplementary material for: A simple self-corrosion method constructs a Ni 3 S 2 @FeOOH heterostructure enabling industrialized seawater oxidation
Source: Royal Society of Chemistry journal article supplement (doi:10.1039/d5gc05658f), 2026-01-01
Supplement: d5gc05658f23.pdf [file d5gc05658f23.pdf]

# Supplementary Material

## **A simple self-corrosion method constructs the $\text{Ni}_3\text{S}_2@\text{FeOOH}$ heterostructure enables industrialized seawater oxidation**

Yujie Yuan,<sup>a,1</sup> Ziyu Yang,<sup>a,1</sup> Hao Wang,<sup>a,1</sup> Tong Wu,<sup>a</sup> Xiaoyi Zhang,<sup>a</sup> Lin Chen,<sup>a</sup>  
Zhaohuan Wei,<sup>b,\*</sup> Rui Wang,<sup>c</sup> C. Venkata Reddy,<sup>d</sup> Jaesool Shim<sup>d,\*</sup>, Hui Tang,<sup>a,\*</sup>

<sup>a</sup> *School of Materials and Energy, University of Electronic Science and Technology of China, Chengdu 611731, Sichuan, China*

<sup>b</sup> *School of Physics, University of Electronic Science and Technology of China, Chengdu 611731, Sichuan, China*

<sup>c</sup> *School of Mechanical and Electrical Engineering, Chengdu University of Technology, Chengdu, 610059, China*

<sup>d</sup> *School of Mechanical Engineering, Yeungnam University, Gyeongsan 38541, Republic of Korea*

\*Corresponding Author

**DFT calculations:** All the calculations were performed within the framework of the density functional theory (DFT) as implemented in the Vienna Ab initio Software Package (VASP) code within the Perdew-Burke-Ernzerhof (PBE) generalized gradient approximation and the projected augmented wave (PAW) method.<sup>1</sup> The cutoff energy for the plane-wave basis set was set to 450 eV. Monkhorst–Pack special k-point meshes of  $3 \times 3 \times 1$  were proposed to carry out geometry optimization and electronic structure calculation. During the geometry optimization, all atoms were allowed to relax without any constraints until the convergence thresholds of maximum force and energy were smaller than 0.01 eV/Å and  $1.0 \times 10^{-5}$  eV/atom, respectively.<sup>2</sup> A vacuum layer of 15 Å was introduced to avoid interactions between periodic images. The intermolecular van der Waals forces were corrected using the method of DFT-D3.<sup>3</sup> The adsorption energy ( $E_{\text{ads}}$ ) of the anions is calculated by the equation:  $E_{\text{ads}} = E_{\text{total}} - E_{\text{catalyst}} - E_{\text{mol}}$ , in which the  $E_{\text{total}}$  represents the total energy;  $E_{\text{catalyst}}$  represents the catalyst model energy; and  $E_{\text{mol}}$  represents the energy of adsorbed anions. The Gibbs free energy of each elementary step was calculated as:

$$\Delta G = \Delta E + \Delta \text{ZPE} - T\Delta S$$

where  $\Delta E$  is the total energy difference between the pristine surface and adsorbing surface calculated.  $\Delta \text{ZPE}$  and  $\Delta S$  refer to the change in zero-point energies and entropy during the reaction, respectively. The Gibbs free energy correction for enthalpy and entropy at standard condition (1 atm, 298.15K) was considered.

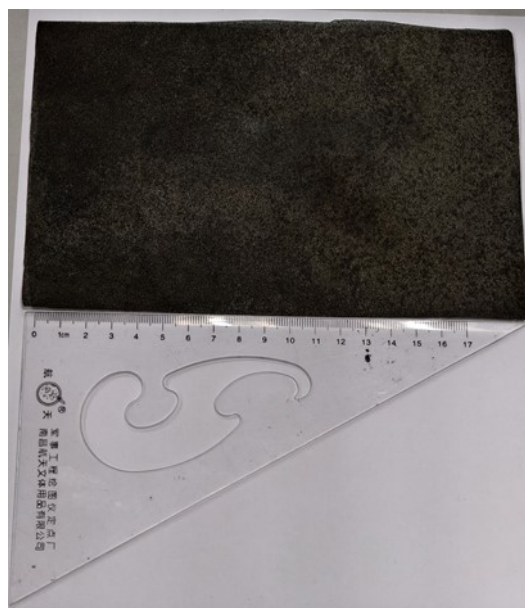

**Figure S1.** Digital photography of  $\text{Ni}_3\text{S}_2@\text{FeOOH}/\text{NF}$  with a large size.

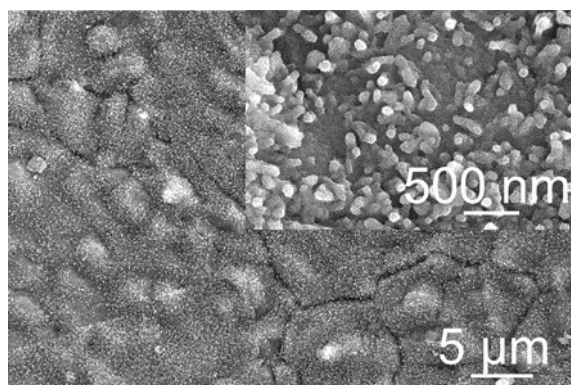

**Figure S2.** Low- and high-magnification SEM images of Ni<sub>3</sub>S<sub>2</sub>/NF.

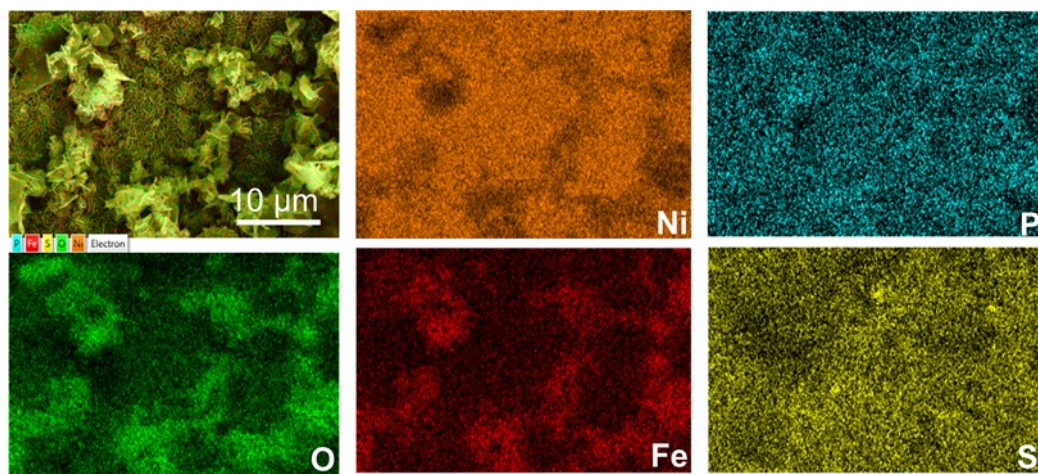

**Figure S3.** SEM and corresponding EDX elemental mapping images of  $\text{Ni}_3\text{S}_2@\text{FeOOH}/\text{NF}$ .

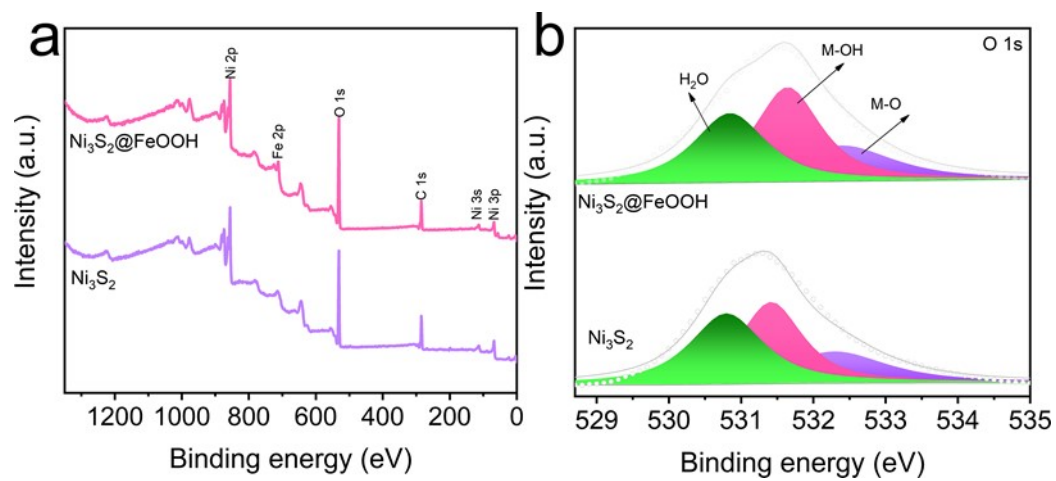

**Figure S4.** Survey spectrum and high-resolution XPS spectrum for  $\text{Ni}_3\text{S}_2/\text{NF}$  and  $\text{Ni}_3\text{S}_2@\text{FeOOH}/\text{NF}$ .

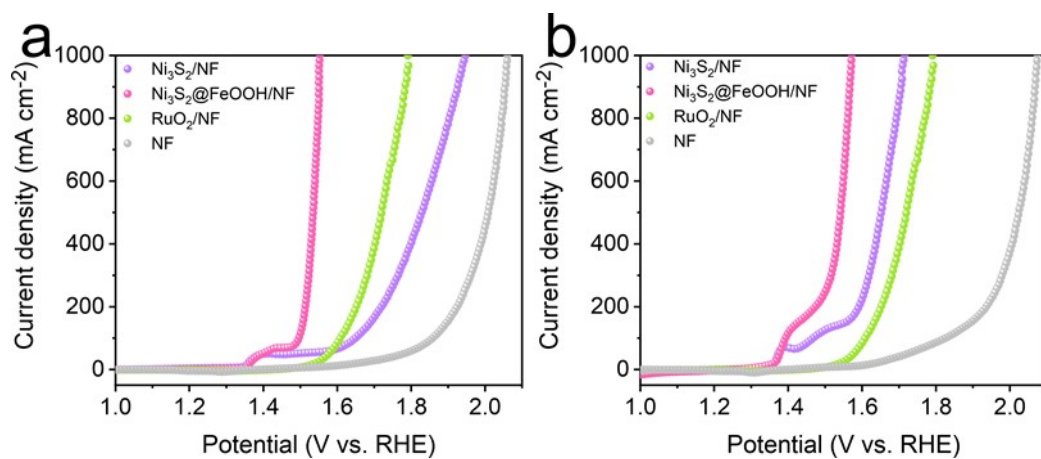

**Figure S5.** LSV curves of  $\text{Ni}_3\text{S}_2/\text{NF}$  and  $\text{Ni}_3\text{S}_2@\text{FeOOH}/\text{NF}$ ,  $\text{RuO}_2/\text{NF}$ , and NF in 1 M KOH (with 90% iR correction). (a) 1 M KOH. (b) 1 M KOH + 0.5 M NaCl.

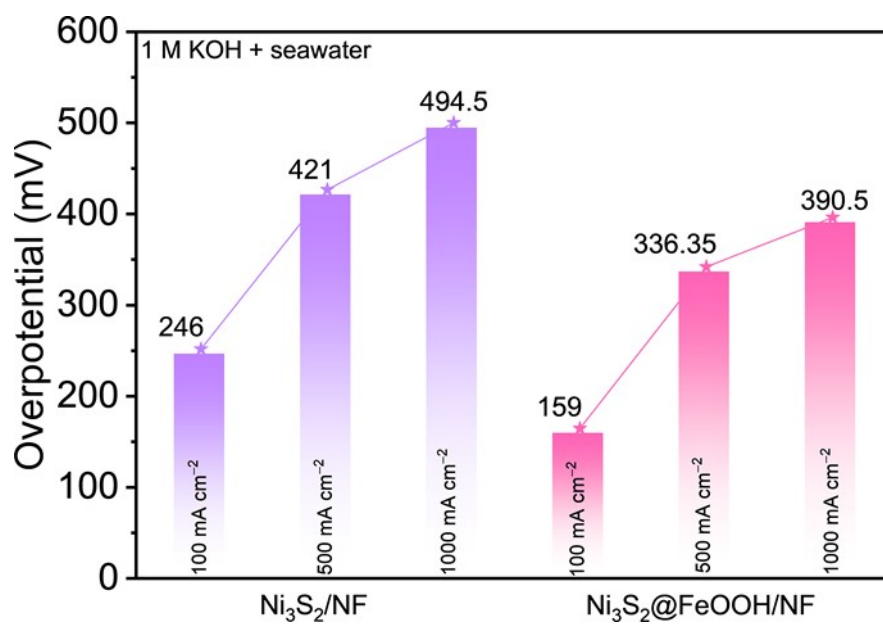

**Figure S6.** Comparison of the overpotential and stability of  $\text{Ni}_3\text{S}_2/\text{NF}$  and  $\text{Ni}_3\text{S}_2@\text{FeOOH}/\text{NF}$  in 1 M KOH + seawater at  $1000 \text{ mA cm}^{-2}$ .



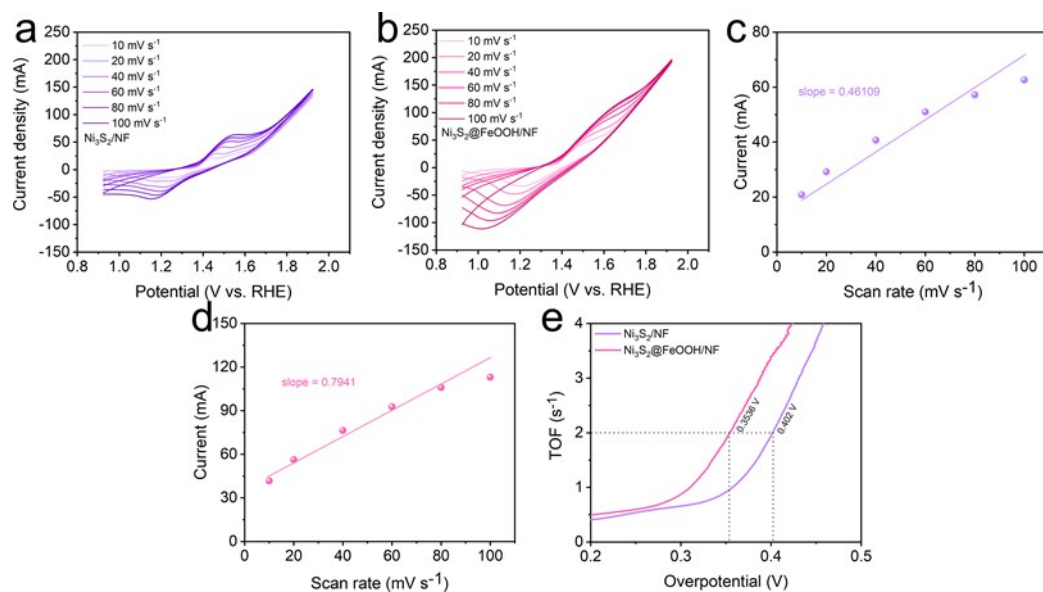

**Figure S7.** CV curves for (a)  $\text{Ni}_3\text{S}_2/\text{NF}$ , (b)  $\text{Ni}_3\text{S}_2@\text{FeOOH}/\text{NF}$  at different scan rates increasing from 10 to 100  $\text{mV s}^{-1}$  in alkaline seawater. Oxidation peak current versus the scan rate plot for (c)  $\text{Ni}_3\text{S}_2/\text{NF}$ , (d)  $\text{Ni}_3\text{S}_2@\text{FeOOH}/\text{NF}$ , (e) TOF plot.

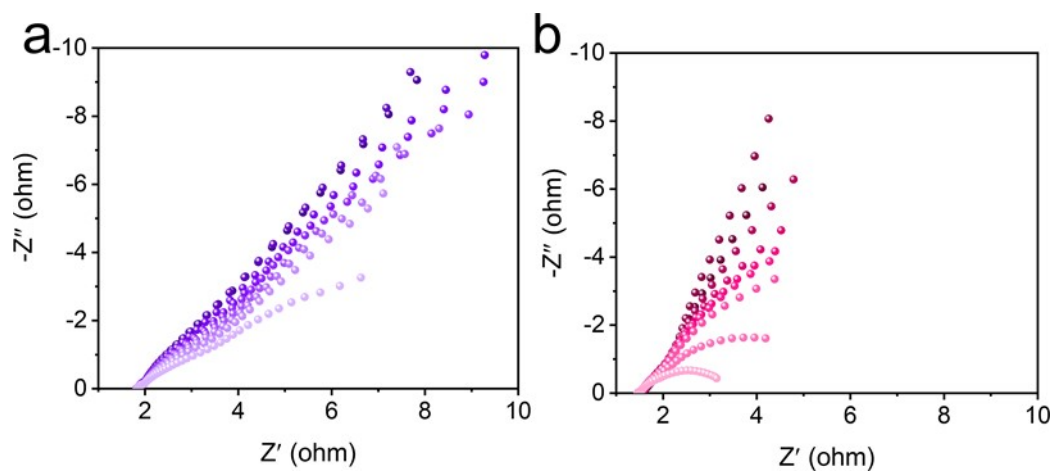

**Figure S8.** Bode plots corresponding to Nyquist plots for (a)  $\text{Ni}_3\text{S}_2/\text{NF}$  and (b)  $\text{Ni}_3\text{S}_2@\text{FeOOH}/\text{NF}$ .

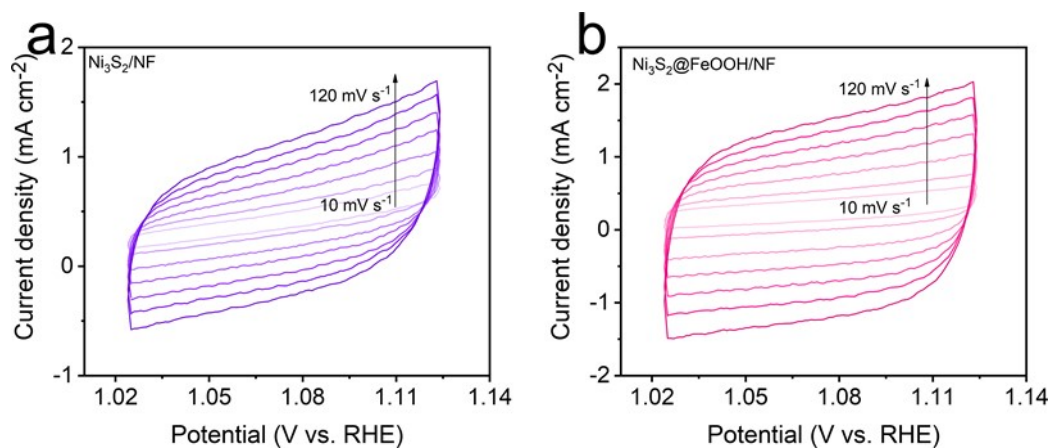

**Figure S9.** CV curves for (a) Ni<sub>3</sub>S<sub>2</sub>/NF, (b) Ni<sub>3</sub>S<sub>2</sub>@FeOOH/NF in the double layer region at different scan rates of 10, 20, 40, 60, 80, 100, 120, and 140 mV s<sup>-1</sup> in 1 M KOH + seawater.

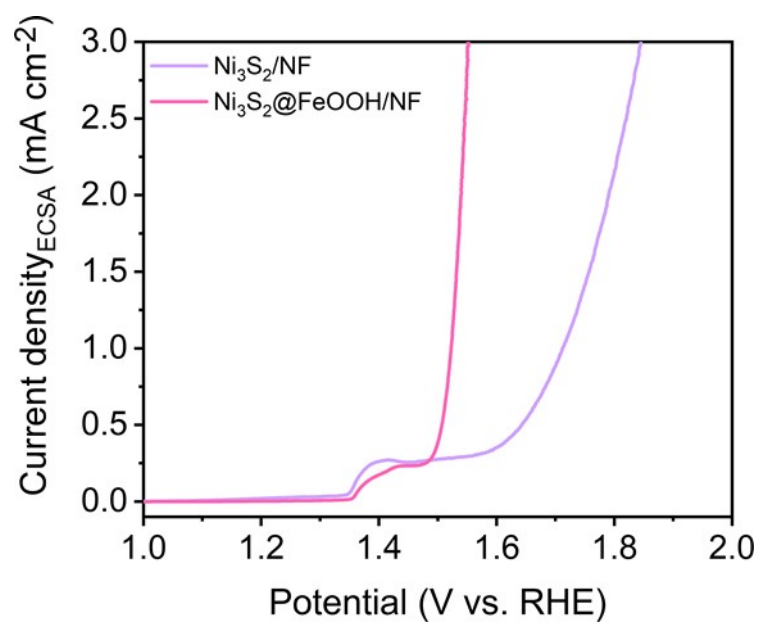

**Figure S10.** LSV curves normalized by electrochemical active surface area for Ni<sub>3</sub>S<sub>2</sub>/NF and Ni<sub>3</sub>S<sub>2</sub>@FeOOH/NF in 1 M KOH + seawater.

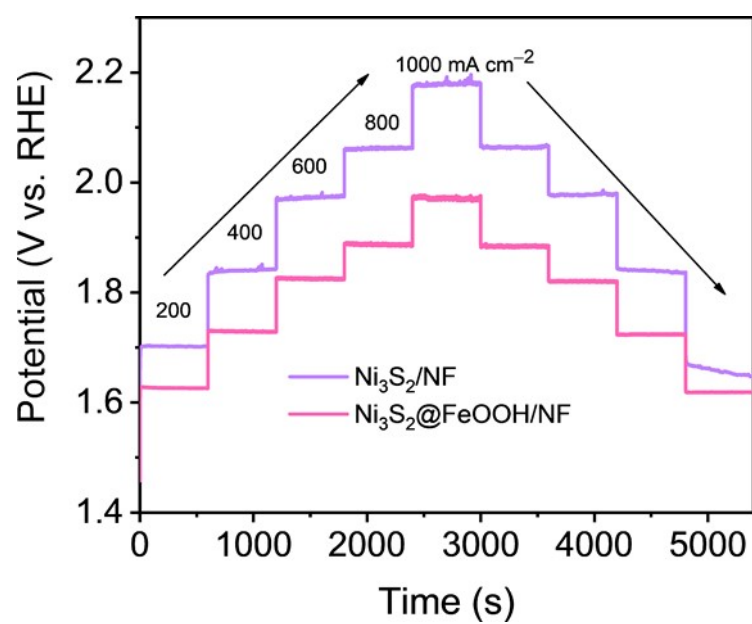

**Figure S11.** Multistep chronopotentiometric curves of  $\text{Ni}_3\text{S}_2/\text{NF}$  and  $\text{Ni}_3\text{S}_2@\text{FeOOH}/\text{NF}$  without iR-correction.

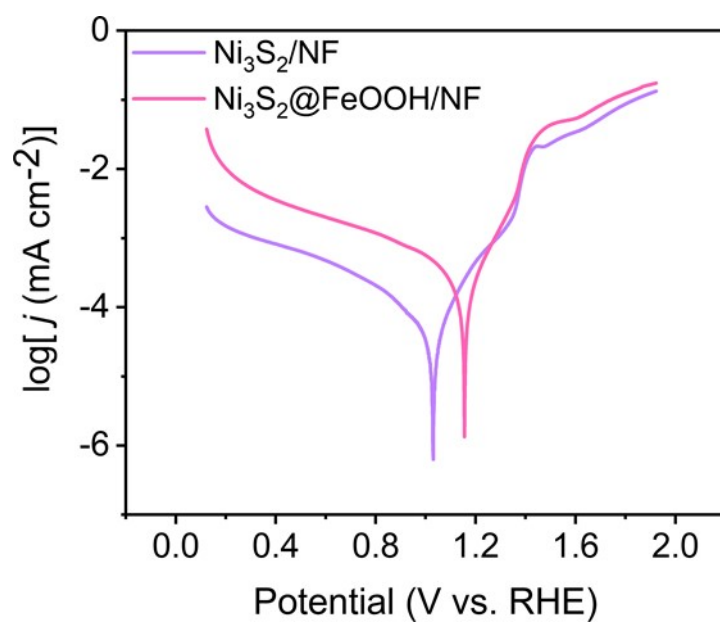

**Figure S12.** Corrosion polarization curves of  $\text{Ni}_3\text{S}_2/\text{NF}$  and  $\text{Ni}_3\text{S}_2@\text{FeOOH}/\text{NF}$  in 1 M KOH + seawater.

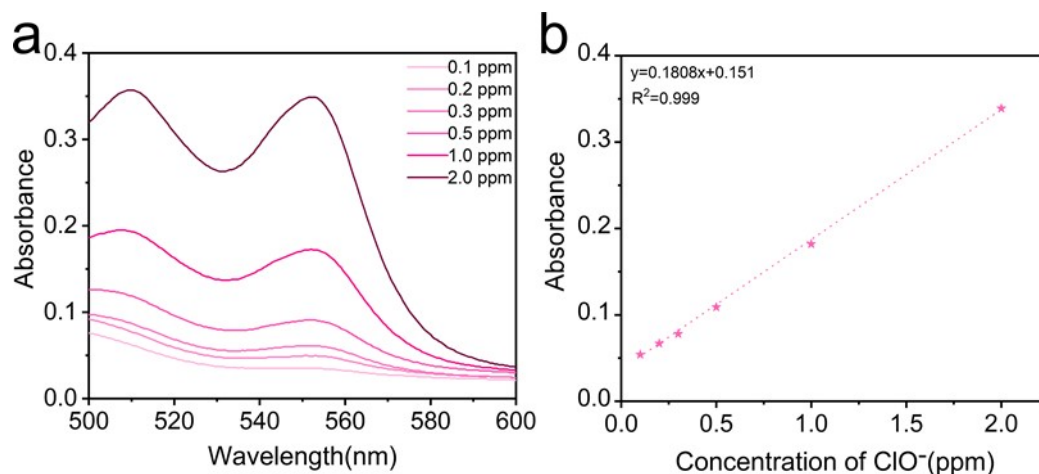

**Figure S13.** (a) UV-vis absorption spectra of various active chlorine concentrations and (b) the corresponding linear fit.

**Determination of active chlorine:** The concentration of active chlorine in the electrolyte was determined based on the DPD method using a UV-vis spectrophotometer. Firstly, the 100  $\mu\text{L}$  of stability-tested electrolyte was successively mixed with 50  $\mu\text{L}$  of  $\text{H}_2\text{SO}_4$  (1.0 M), 50  $\mu\text{L}$  of  $\text{NaOH}$  (2.0 M), and 4.8 mL of deionized water. Then, 250  $\mu\text{L}$  of DPD reagent and 250  $\mu\text{L}$  of PBS (pH = 6.5) were added to the above solution. After two minutes of color development away from light, the color of the solution turns transparent pink. The absorbance at 550 nm was determined by UV-vis absorption spectrometry, and the concentrations of different active chlorine were analyzed [4-5].

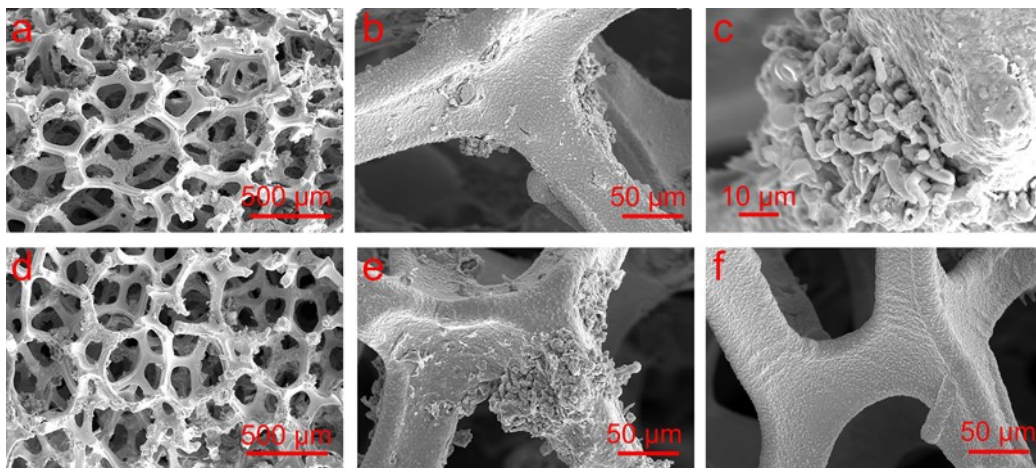

**Figure S14.** SEM images of  $\text{Ni}_3\text{S}_2@\text{FeOOH}/\text{NF}$  after stability at  $1000 \text{ mA cm}^{-2}$  (a-c) and  $2000 \text{ mA cm}^{-2}$  (d-f) in 1 M KOH + seawater.



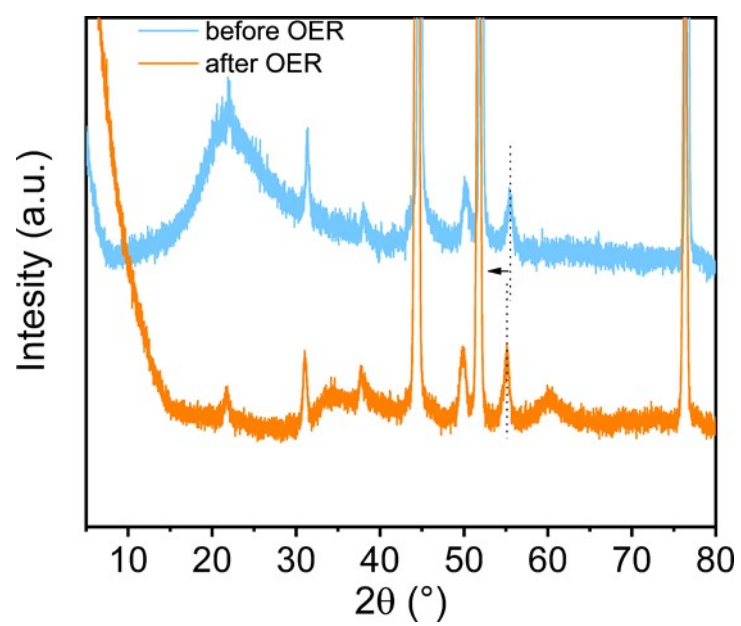

**Figure S15.** XRD patterns of  $\text{Ni}_3\text{S}_2@\text{FeOOH}/\text{NF}$  before and after the stability test in 1 M KOH + seawater.

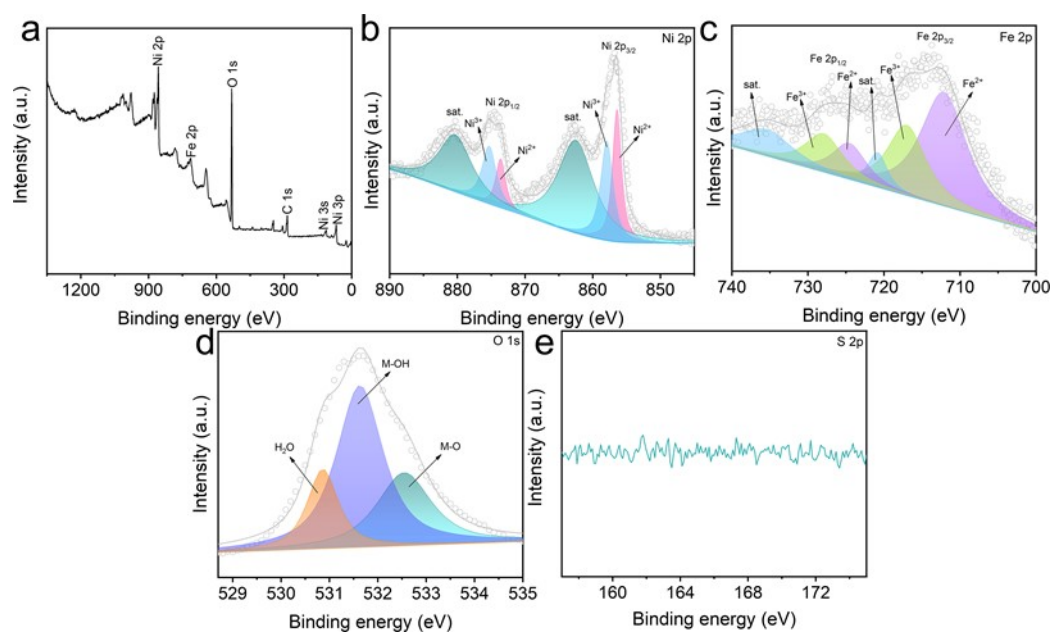

**Figure S16.** (a) Survey spectrum of XPS for  $\text{Ni}_3\text{S}_2@\text{FeOOH}/\text{NF}$  after the stability test. XPS spectra of  $\text{Ni}_3\text{S}_2@\text{FeOOH}/\text{NF}$  in the (b) Ni 2p, (c) Fe 2p, (d) O 1s, and (e) S 2p regions after the stability test.

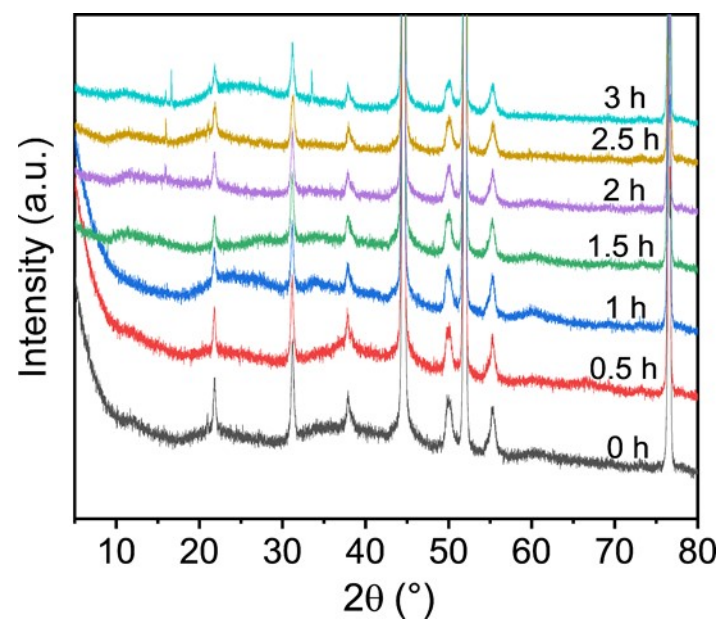

**Figure S17.** In situ XRD spectra of  $\text{Ni}_3\text{S}_2@\text{FeOOH}/\text{NF}$ .

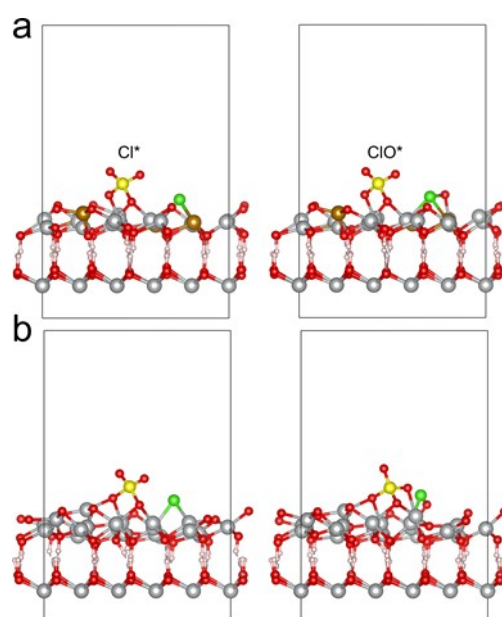

**Figure S18.** Possible ClOR pathways of (a)  $\text{SO}_4^{2-}$ -NiFeOOH and (b)  $\text{SO}_4^{2-}$ -NiOOH.

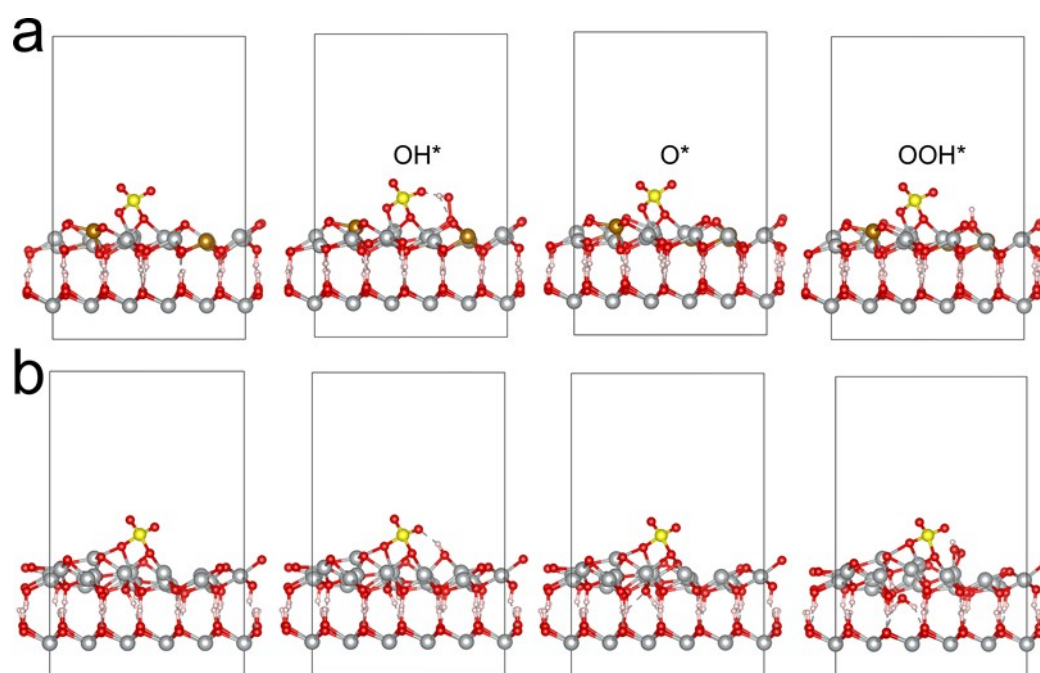

**Figure S19.** Possible AEM-based pathways of (a)  $\text{SO}_4^{2-}$ -NiFeOOH and (b)  $\text{SO}_4^{2-}$ -NiOOH.

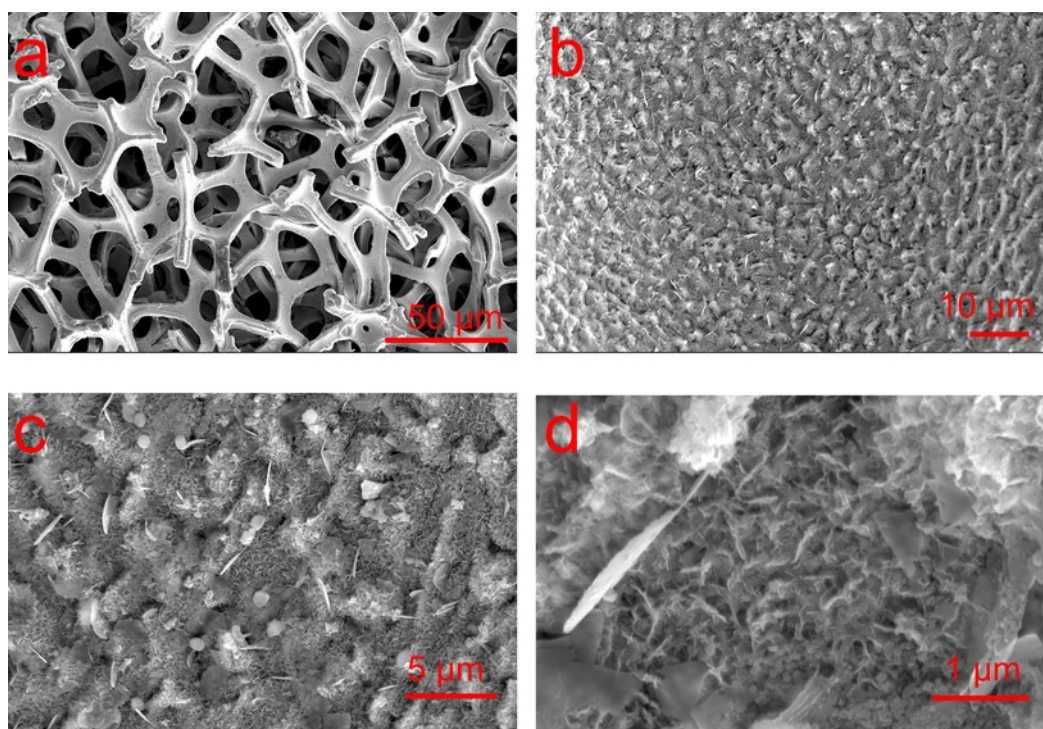

**Figure S20.** SEM image of  $\text{Ni}_3\text{S}_2@\text{FeOOH}/\text{NF}$  after long-term flow cell operation.

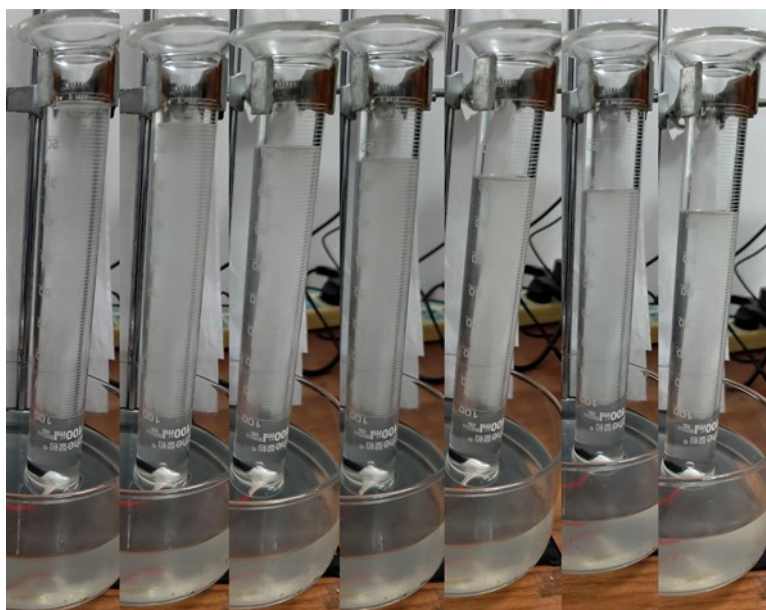

**Figure S21.** Collection of oxygen evolved from seawater oxidation at the  $j$  of  $1000 \text{ mA cm}^{-2}$  by water drainage method.

**Table. S1** Comparison of OER catalytic activity for Ni<sub>3</sub>S<sub>2</sub>@FeOOH/NF with recently reported catalysts in alkaline seawater.

| Catalyst                                                          | $j@time@η$                             | electrolyte                                                | Reference                                              |
|-------------------------------------------------------------------|----------------------------------------|------------------------------------------------------------|--------------------------------------------------------|
| NiFeO-CeO <sub>2</sub> /NF                                        | 1000 mA cm <sup>-2</sup> @200 h@408 mV | 1 M KOH + seawater                                         | ACS Nano. 2023, 17, 16008–16019.                       |
| FeMoOOH                                                           | 1500 mA cm <sup>-2</sup> @1000 h       | 1 M KOH + seawater                                         | Energy Environ. Sci. 2025, 18, 1952–1962.              |
| Ni(OH) <sub>2</sub> -P <sub>3</sub> O <sub>10</sub> <sup>5-</sup> | 1400 mA cm <sup>-2</sup> @240 h        | 1 M KOH + seawater                                         | Adv. Energy Mater. 2025, 15, 2402883.                  |
| F-NiFe-LDH                                                        | 1000 mA cm <sup>-2</sup> @1000 h       | 1 M KOH + seawater                                         | Adv. Funct. Mater. 2025, 2423965.                      |
| FeCoNiMoV oxide                                                   | 1000 mA cm <sup>-2</sup> @100 h        | 1 M KOH + seawater                                         | Chemical Engineering Journal. 2024, 495, 153408.       |
| MoNiP                                                             | 1000 mA cm <sup>-2</sup> @1500 h       | 1 M KOH + 0.5 M NaCl                                       | Adv. Energy Mater. 2025, 15, 2403009.                  |
| NFCVM-5                                                           | 1000 mA cm <sup>-2</sup> @500 h        | 1 M KOH + seawater                                         | Small. 2024, 20, 2402720.                              |
| MoO <sub>3</sub> @CoO/CC                                          | 600 mA cm <sup>-2</sup> @1000 h        | 1 M KOH + seawater                                         | Nature Communications. 2024, 15, 2481.                 |
| CoFePBA/Co <sub>2</sub> P                                         | 1000 mA cm <sup>-2</sup> @1000 h       | 20 wt% NaOH + seawater                                     | Angew. Chem. Int. Ed. 2023, 62, e202309882.            |
| CoFeAl-LDH                                                        | 1000 mA cm <sup>-2</sup> @500 h        | 1 M KOH + seawater                                         | Nature Communications. 2024, 15, 4712.                 |
| NiFe-LDH-CO <sub>3</sub> <sup>2-</sup>                            | 500、1000 mA cm <sup>-2</sup> @1000 h   | 1 M KOH + 0.5 M NaCl + 1 M Na <sub>2</sub> CO <sub>3</sub> | Adv. Energy Mater. 2024, 14, 2400053.                  |
| Ir-CoFe-LDH                                                       | 400-800 mA cm <sup>-2</sup> @1000 h    | 6 M NaOH+2.8 M NaCl                                        | Nature Communications. 2024, 15, 1973.                 |
| Ru <sub>0.1</sub> -NiFeOOH-PO <sub>4</sub> <sup>3-</sup>          | 500 mA cm <sup>-2</sup> @1000 h        | 1 M KOH + seawater                                         | EES Catal. 2024, 2, 1092–1099.                         |
| NiFe-CuCo LDH                                                     | 500 mA cm <sup>-2</sup> @500 h         | 6 M KOH + seawater                                         | PNAS. 2022, 119, e2202382119.                          |
| NiCoP <sub>v</sub> @NF                                            | 500 mA cm <sup>-2</sup> @110 h         | 1 M KOH + seawater                                         | Adv. Energy Mater. 2024, 14, 2400975.                  |
| Ru-Ni <sub>2</sub> P/Fe <sub>2</sub> P                            | 500 mA cm <sup>-2</sup> @100 h         | 1 M KOH + seawater                                         | Adv. Funct. Mater. 2024, 34, 2400734.                  |
| Fe <sub>3</sub> Se <sub>4</sub> -NiSe <sub>2</sub> @Mxene         | 500 mA cm <sup>-2</sup> @140 h@300 mV  | 1 M KOH + seawater                                         | Adv. Funct. Mater. 2025, 2424718.                      |
| (Ni,Fe)OOH@Ni <sub>x</sub> P                                      | 500 mA cm <sup>-2</sup> @100 h@318 mV  | 1 M KOH + seawater                                         | Applied Catalysis B: Environmental. 2023, 336, 122926. |
| SO <sub>4</sub> <sup>2-</sup> /CoFe LDH                           | 500 mA cm <sup>-2</sup> @1000 h        | 1 M KOH + seawater                                         | Adv. Funct. Mater.                                     |



|                                                                       |                                        |                                                              |                                                                 |
|-----------------------------------------------------------------------|----------------------------------------|--------------------------------------------------------------|-----------------------------------------------------------------|
|                                                                       |                                        |                                                              | 2025, 2419871.                                                  |
| RuMoNi                                                                | 500 mA cm <sup>-2</sup> @3000 h        | 1 M KOH + seawater                                           | Nature Communications. 2023, 14, 3607.                          |
| Os-Ni <sub>4</sub> Mo/MoO <sub>2</sub>                                | 500 mA cm <sup>-2</sup> @2500 h@336 mV | 1 M KOH + seawater                                           | Adv. Mater. 2024, 36, 2408982.                                  |
| OP-NiCo-LDH                                                           | 500 mA cm <sup>-2</sup> @500 h@330 mV  | 1 M KOH + seawater                                           | Applied Catalysis B: Environmental. 2023, 332, 122749.          |
| Ni <sub>x</sub> Cr <sub>y</sub> O                                     | 500 mA cm <sup>-2</sup> @100 h         | 1 M KOH + seawater                                           | Angew. Chem. Int. Ed. 2023, 62, e202309854.                     |
| Nb-NiOOH-O <sub>v</sub>                                               | 500 mA cm <sup>-2</sup> @100 h         | 1 M KOH + seawater                                           | ACS Nano. 2025, 19, 9070–9080.                                  |
| Fe–NiSOH                                                              | 500 mA cm <sup>-2</sup> @1100 h@268 mV | 1 M KOH + seawater                                           | Energy Environ. Sci. 2022, 15, 4647–4658.                       |
| Co-NiSe <sub>2</sub>                                                  | 500 mA cm <sup>-2</sup> @1500 h        | 1 M KOH + seawater                                           | Applied Catalysis B: Environment and Energy. 2024, 344, 123658. |
| R-CoNiPS                                                              | 500 mA cm <sup>-2</sup> @200 h@420 mV  | 1 M KOH + seawater                                           | Journal of Energy Chemistry. 2024, 94, 508–516.                 |
| CoNi-LDH/FeSe                                                         | 500 mA cm <sup>-2</sup> @500 h@338 mV  | 1 M KOH + seawater                                           | Chemical Engineering Journal. 2024, 498, 155834.                |
| Ce <sub>2</sub> (CO <sub>3</sub> ) <sub>2</sub> O·H <sub>2</sub> O@Fc | 500mA cm <sup>-2</sup> @300 h          | 1 M KOH + seawater                                           | Chemical Engineering Journal. 2025, 507, 160375.                |
| B-Co <sub>2</sub> Fe LDH                                              | 500 mA cm <sup>-2</sup> @100h          | 1 M KOH + seawater                                           | Nano Energy 83 (2021) 105838.                                   |
| ((Ni,Fe)S <sub>2</sub> @Ti <sub>3</sub> C <sub>2</sub> )              | 500 mA cm <sup>-2</sup> @1000 h        | 1 M KOH + 0.5 M NaCl                                         | Nature Communications. 2025, 16, 1319.                          |
| (FeCoNiMnAl) <sub>3</sub> O <sub>4</sub>                              | 500 mA cm <sup>-2</sup> @50 h          | 1 M KOH + seawater                                           | Applied Catalysis B: Environment and Energy. 2024, 349, 123875. |
| NiFe LDH                                                              | 400mA cm <sup>-2</sup> @1000h          | 1 M NaOH +seawater +0.05 M Na <sub>2</sub> SO <sub>4</sub>   | Angew. Chem. Int. Ed. 2021, 60, 22740 – 22744.                  |
| NiFe-LDH@Ag                                                           | 400 mA cm <sup>-2</sup> @2500 h        | 1 M KOH + seawater                                           | Adv. Mater. 2024, 36, 2306062.                                  |
| NiFeBa-LDH                                                            | 400 mA cm <sup>-2</sup> @10000 h       | 1 M NaOH + seawater + 0.05 M Na <sub>2</sub> SO <sub>4</sub> | Adv. Mater. 2024, 36, 2411302.                                  |

|                                                      |                                                                     |                      |                                                                          |
|------------------------------------------------------|---------------------------------------------------------------------|----------------------|--------------------------------------------------------------------------|
| (Ni,Fe)O(OH)@NiCoS<br>NAs                            | 400 ~ 600 mA cm <sup>-2</sup><br>@300 h                             | 1 M KOH + seawater   | Journal of Energy<br>Chemistry. 2024, 91,<br>370–382.                    |
| S-(Fe)Ni <sub>2</sub> Mo <sub>3</sub> O <sub>8</sub> | 200 mA cm <sup>-2</sup> @800<br>h@408 mV                            | 1 M KOH + seawater   | Chem Catalysis. 2024,<br>4, 101144.                                      |
| Li-NiFe-LDH-g-C <sub>3</sub> N <sub>4</sub>          | 200 mA cm <sup>-2</sup> @100 h                                      | 1 M KOH + seawater   | Chemical Engineering<br>Journal 2023, 473,<br>145293.                    |
| NiFe LDH-FLPs                                        | 200 mA cm <sup>-2</sup> @250 h                                      | 1 M KOH + seawater   | Angew. Chem. Int. Ed.<br>2025, 64, e202414721.                           |
| Mo-Ni <sub>3</sub> S <sub>2</sub> /VO <sub>2</sub>   | 200 mA cm <sup>-2</sup> @1500 h                                     | 1 M KOH + seawater   | Applied Catalysis B:<br>Environment and<br>Energy. 2025, 365,<br>124925. |
| NiTe@FeOOH                                           | 100 mA cm <sup>-2</sup> @100<br>h@280 mV                            | 1 M KOH + seawater   | Chemical Engineering<br>Journal. 2023, 474,<br>145568.                   |
| Ni-BDC/NH <sub>2</sub> -MIL-<br>88B(Fe)              | 100 mA cm <sup>-2</sup> @200<br>h@299 mV                            | 1 M KOH + seawater   | Adv. Funct. Mater.<br>2024, 34, 2314611.                                 |
| NiFeCoP                                              | 100 mA cm <sup>-2</sup> @100 h                                      | 1 M KOH + seawater   | ACS Catal. 2024, 14,<br>18322–18332.                                     |
| Mn-FeP <sub>v</sub>                                  | 100 mA cm <sup>-2</sup> @100 h                                      | 1 M KOH + seawater   | Small. 2024, 20,<br>2308613.                                             |
| MnFeCoNiPS <sub>3</sub>                              | 100 mA cm <sup>-2</sup> @1200<br>h@313 mV                           | 1 M KOH + seawater   | Adv. Funct. Mater.<br>2025, 2417211.                                     |
| LiFePO <sub>4</sub>                                  | 100 mA cm <sup>-2</sup> @600 h                                      | 1 M KOH + seawater   | Angew. Chem. Int. Ed.<br>2024, 63, e202410396.                           |
| (CoMo) <sub>0.85</sub> Se@FeOOH                      | 50 mA cm <sup>-2</sup> @140 h                                       | 1 M KOH + 0.5 M NaCl | ACS Catal. 2023, 13,<br>15360–15374.                                     |
| Ni <sub>3</sub> Fe-LDHs@CoP <sub>x</sub>             | 10 mA cm <sup>-2</sup> @350<br>h@370 mV                             | 1 M KOH + seawater   | Chemical Engineering<br>Journal. 2023, 460<br>141413.                    |
| NiFe@DG                                              | 10 mA cm <sup>-2</sup> @2000<br>h@218 mV                            | 1 M KOH + seawater   | ACS Nano. 2023, 17,<br>18372–18381.                                      |
| Ni <sub>3</sub> S <sub>2</sub> @FeOOH/NF             | 1000 mA cm <sup>-2</sup> @1400 h<br>2000 mA cm <sup>-2</sup> @500 h | 1 M KOH + seawater   | This work                                                                |

## References

- [1] S. Vijay, W. Ju, S. Brückner, S.-C. Tsang, P. Strasser, K. Chan, *Nat. Catal.* 2021, 4 1024–1031.
- [2] J. Santatiwongchai, K. Faungnawakij, P. Hirunsit, *ACS Catal.* 2021, 11, 9688–9701.
- [3] N. Yang, L. Peng, L. Li, J. Li, Q. Liao, M. Shao, Z. Wei, *Chem. Sci.* 2021, 12, 12476–12484.
- [4] L. Zhang, J. Liang, X. He, Q. Yang, Y. Luo, D. Zheng, S. Sun, J. Zhang, H. Yan, B. Ying, X. Guo, X. Sun, *Inorg. Chem. Front.* 2023, 10, 2100–2106.
- [5] J. G. Vos, M. T. M. Koper, *J. Electroanal. Chem.* 2018, 819, 260–268.
