# Supplementary figures and images for: A simple self-corrosion method constructs a Ni 3 S 2 @FeOOH heterostructure enabling industrialized seawater oxidation
Source: Royal Society of Chemistry journal article supplement (doi:10.1039/d5gc05658f), 2026-01-01

**a**

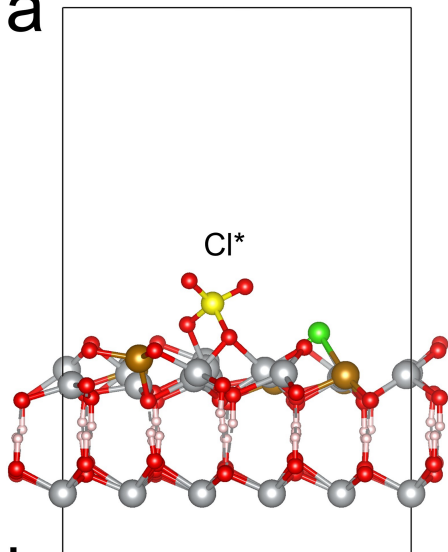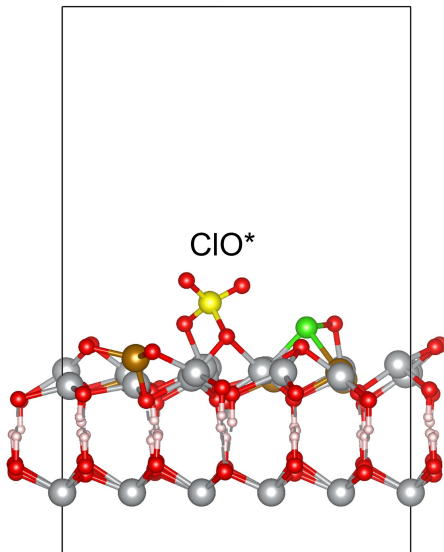

**b**

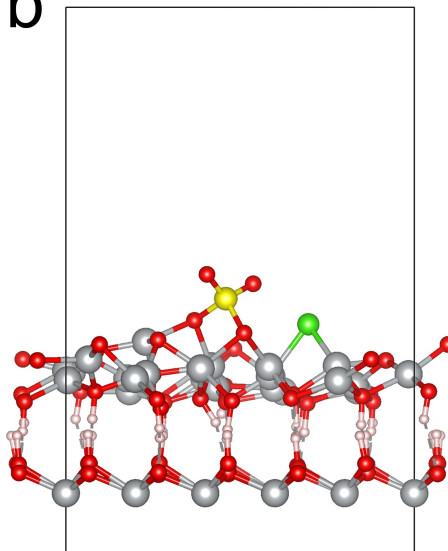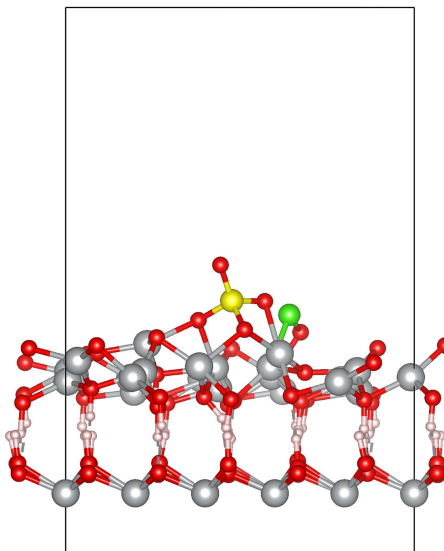

Supplement: d5gc05658f11.pdf [file d5gc05658f11.pdf]

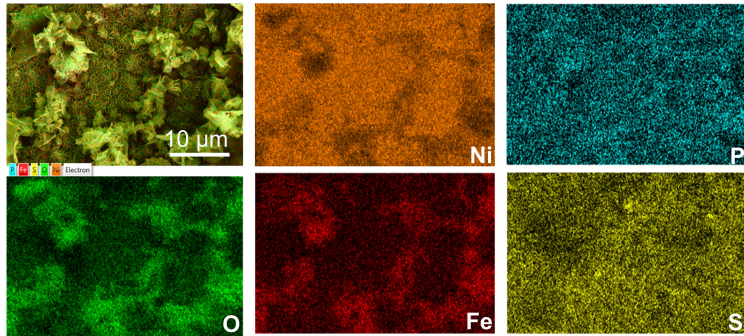

Supplement: d5gc05658f16.pdf [file d5gc05658f16.pdf]
